# Supplementary material for: Seedless assembly of colloidal crystals by inverted micro-fluidic pumping
Source: Royal Society of Chemistry journal article supplement (doi:10.1039/c8sm00256h), 2018-01-01
Supplement: c8sm00256h1.pdf [file c8sm00256h1.pdf]

## Seedless assembly of colloidal crystals by inverted micro-fluidic pumping

Ran Niu\*, Thomas Palberg

*Institut für Physik, Johannes-Gutenberg Universität, Staudingerweg 7, 55128, Mainz*

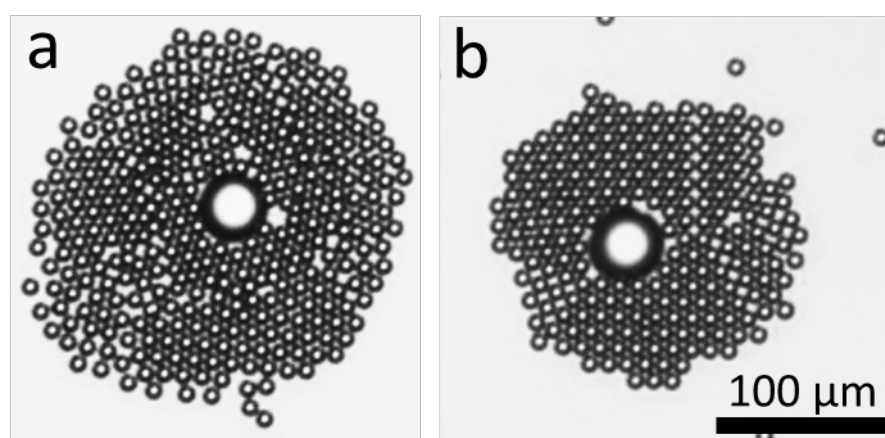

**Fig. S1** Low quality colloidal crystal of PS10 in eo-pumping of IEX45: no crystalline order (a) and multi-domain crystal on uncoated substrate due to the incommensurate of the seed and the formed crystal (b). The scale bar in (b) applies for both images.

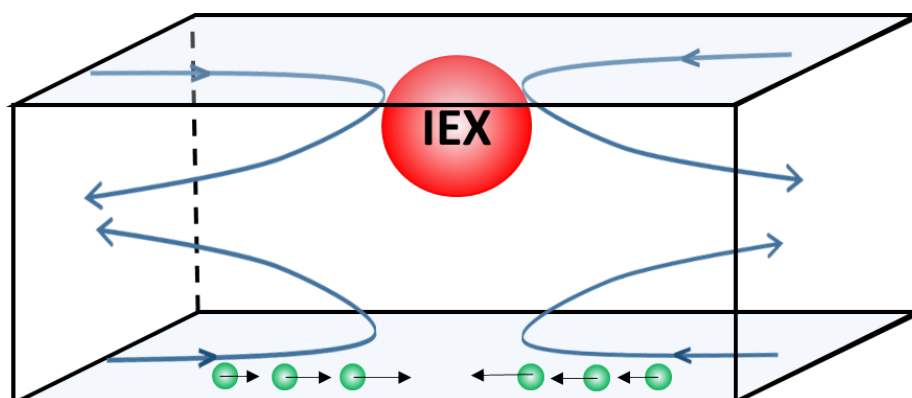

**Fig. S2** A schematic drawing of the IEX-based inverted microfluidic platform.

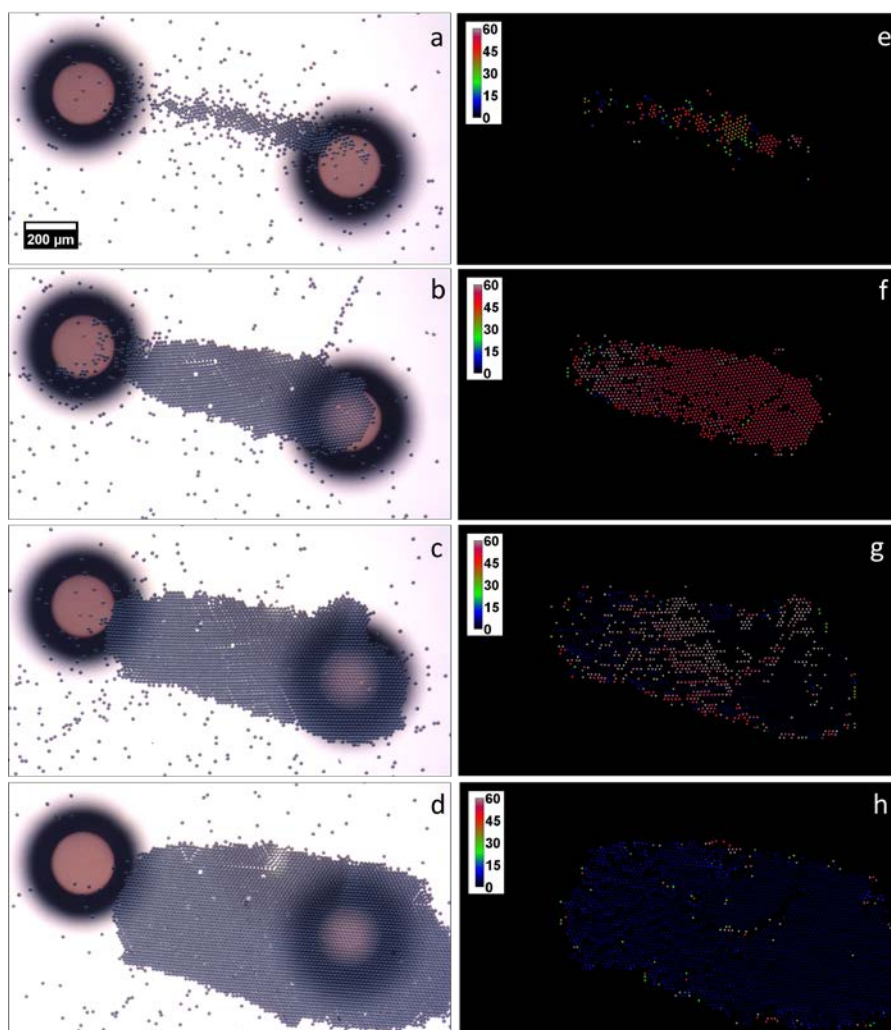

**Fig. S3** Typical stages of oriented crystal formation: PS15 in the inverted pump formed by two spaced IEX500 with center-to-center distance of 1116  $\mu\text{m}$  and orientation of  $16.9^\circ$  relative to the horizontal axis. 200  $\mu\text{m}$  scale bar shown in a) applies to all images. (a) At  $t = 52.5$  min, crystal forms between the two IEX500. (b-d) Crystal grows longer along the central line connecting the two IEX; meantime, the crystal grows wider in the direction perpendicular to the central line. In the process, dislocations and grain boundaries develop and anneal. Images were taken at  $t = 122.5$  min, 167.5 min and 242.5 min, respectively. The corresponding maps of crystalline particles with  $\phi_6 > 0.8$  and the color coded local crystalline orientation relative to the horizontal axis (e-h).

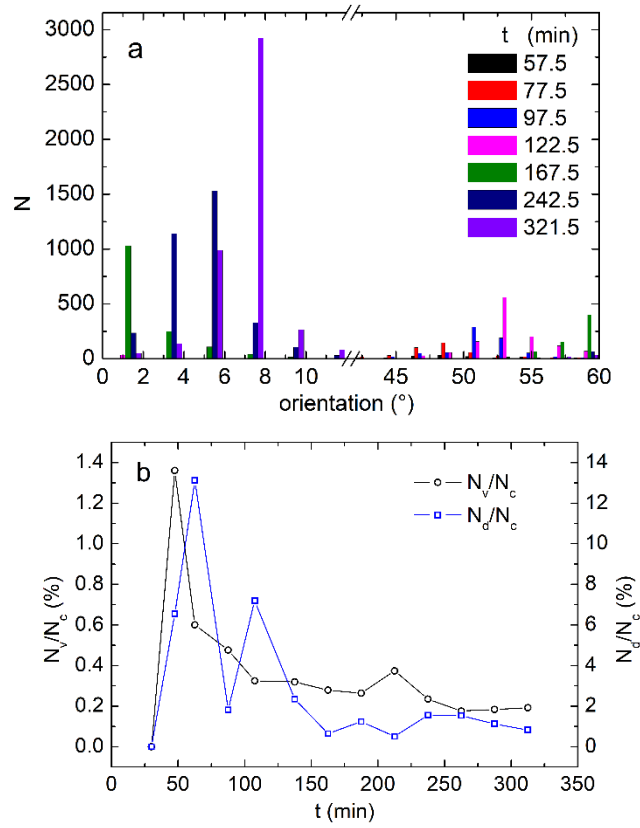

**Fig. S4** (a) Histogram of number of crystalline particles with certain orientations relative to the horizontal axis for the images shown in Fig. S3. (b) Fraction of voids  $N_v/N_c$  and fraction of particles in dislocations and grain boundaries  $N_d/N_c$  as a function of time  $t$  from the start of the experiment.

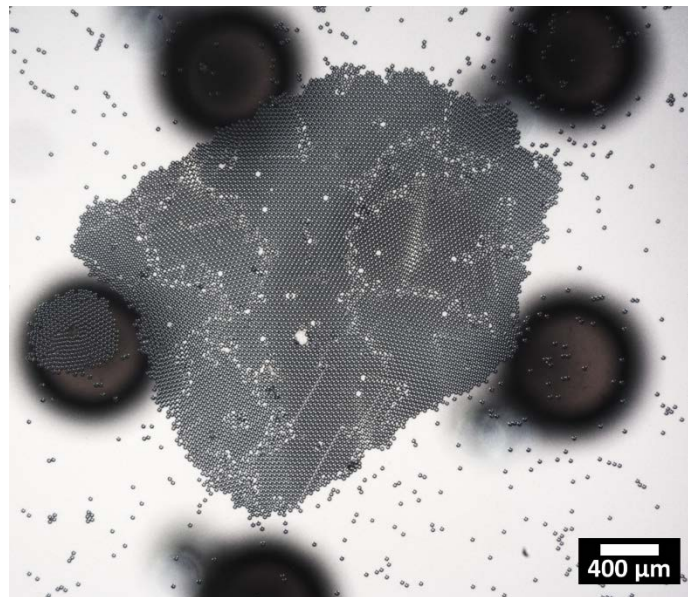

**Fig. S5** Patterning pentagon shaped monolayer colloidal crystal using IEX500-based inverted pump from PS15 at  $H= 1$  mm. Scale bar as indicated.

**Videos:**

Video 1. Single IEX660-based inverted pump at  $H= 1$  mm. PS7 tracer particles are dragged towards the projected center of IEX660. 14x real time speed. Scale bar as indicated.

Video 2. Single crystal formed in single IEX500-based inverted pump from PS10 at  $H= 1$  mm. 600x real time speed. Image size 1217.0x971.6  $\mu\text{m}^2$ .

Video 3. Oriented single crystal formed between two spaced IEX500 (center-to-center distance of 1487  $\mu\text{m}$ , aligned along 30° relative to the horizontal axis)-based inverted pump from PS15 at  $H= 1$  mm. 300x real time speed. Image size 1790.2x1342.6  $\mu\text{m}^2$ .

Video 4. Oriented single crystal formed between two spaced IEX500 (center-to-center distance of 1116  $\mu\text{m}$ , aligned along 16.9° relative to the horizontal axis)-based inverted pump from PS15 at  $H= 1$  mm. 300x real time speed. Image size 1790.2x1342.6  $\mu\text{m}^2$ .

Video 5. Assembly of PS15 and PS10 in the single IEX-based inverted pump. The assembled colloids are mixed without obvious sorting of the size. 200x real time speed. Image size 2727.3x2045.5  $\mu\text{m}^2$ .
